# Supplementary material for: Fabrication of lotus-leaf-like nanoporous silica flakes with controlled thickness
Source: Royal Society of Chemistry journal article supplement (doi:10.1039/b418006b), 2005-01-01
Supplement: b418006b.pdf [file b418006b.pdf]

# Electronic Supplementary Information (ESI)

## Fabrication of lotus-leaf-like nanoporous silica flake with controlled thickness

Wei Shan, Bo Wang, Yahong Zhang and Yi Tang\*

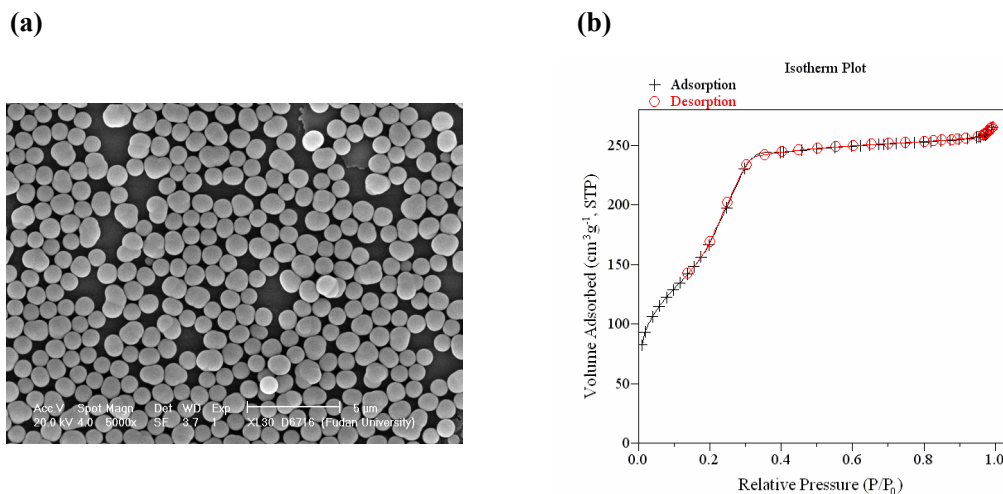

**Fig. S1** SEM image (a) and N<sub>2</sub> sorption isotherms (b) of nanoporous silica sphere. The BET surface area and pore size of nanoporous silica sphere are 589 m<sup>2</sup> g<sup>-1</sup> and 2.4 nm, respectively.

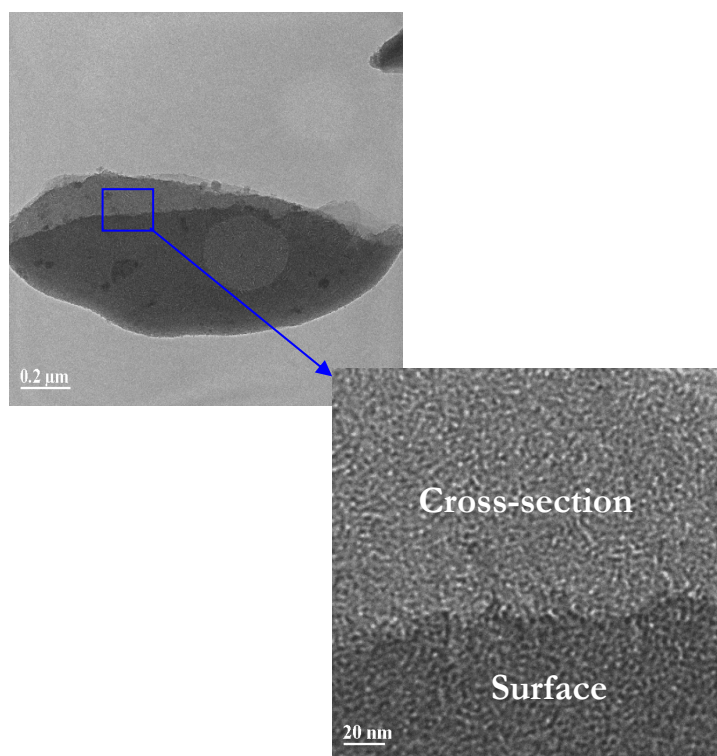

**Fig. S2** TEM images of the cross-section of nanoporous silica flake.

Detailed calculation of the ratio of theoretical external specific surface area between silica flake and sphere:

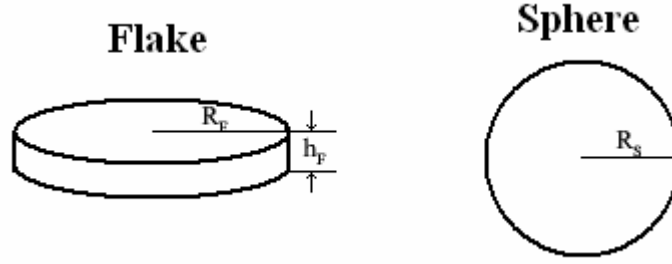

Suppose that the densities of the two silica samples are equal, and then equal mass of silica samples should have equal volume:  $V_F = V_S$ ,

$$V_F = N_F \pi R_F^2 h_F$$

$$V_S = N_S \frac{4}{3} \pi R_S^3 \quad (N_F - \text{number of flakes, } N_S - \text{number of spheres})$$

$$\frac{S_F}{S_S} = \frac{N_F (2\pi R_F^2 + 2\pi R_F h_F)}{N_S 4\pi R_S^2} = \frac{N_F \pi R_F^2 h_F (\frac{2}{h_F} + \frac{2}{R_F})}{N_S \frac{4}{3} \pi R_S^3 \frac{3}{R_S}} = \frac{V_F (\frac{2}{h_F} + \frac{2}{R_F})}{V_S \frac{3}{R_S}} = \frac{\frac{2}{h_F} + \frac{2}{R_F}}{\frac{3}{R_S}}$$

In this case,  $h_F = 0.2 \mu\text{m}$ ,  $R_F = 1.5 \mu\text{m}$  and  $R_S = 0.5 \mu\text{m}$ , therefore,

$$\frac{S_F}{S_S} = \frac{\frac{2}{0.2} + \frac{2}{1.5}}{\frac{3}{0.5}} \approx 1.9$$
